# Supplementary material
Source: PubMed Central journal article supplement (PMC7462180)
Supplement: NIHMS1617832-supplement-Supplemental_figures.pdf [file NIHMS1617832-supplement-Supplemental_figures.pdf]

Veterinary Pathology: Supplemental Materials.  
 Haran et al. Generation and validation of an antibody to canine CD19  
 for diagnostic and future therapeutic purposes.

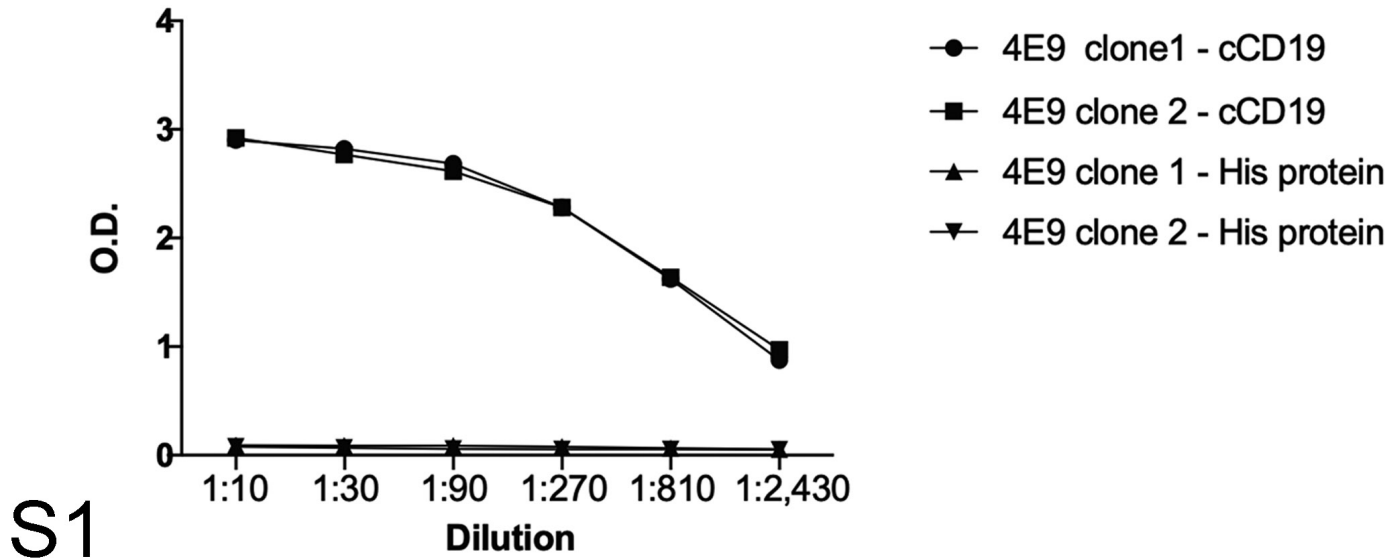

**Supplemental Figure S1.** Supernatants from 2 subclones of 4E9 bind specifically to soluble cCD19. Serial dilutions of supernatants from 4E9 clone 1 and 4E9 clone 2 were incubated with plate bound cCD19 or an irrelevant HIS tagged protein. Both subclones show similar concentration-dependent binding to soluble cCD19. No binding is seen against an irrelevant HIS tagged protein.

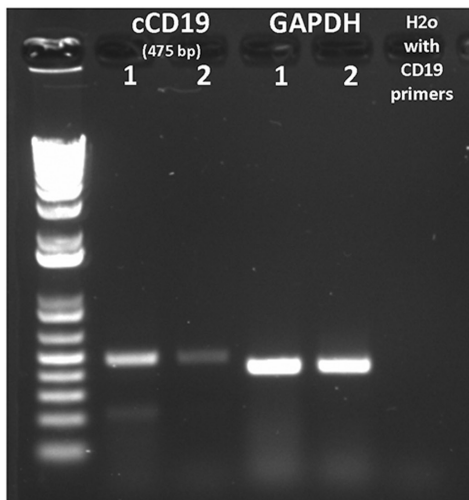

Sample 1: PBMC  
 Sample 2: CLBL-1

**Supplemental Figure S2.** CLBL-1 cells contain CD19 mRNA. RNA was extracted from canine PBMCs and CLBL-1 cells, reverse transcribed and used as a template in a PCR to detect the presence of the CD19 transcript. Sample 1 is canine PBMC cDNA and sample 2 is CLBL-1 cDNA as template. The expected PCR product obtained from the CD19 PCR was 475bp (within the extracellular portion of cCD19) and was detected in canine PBMCs and CLBL-1 cells. GAPDH is included as a positive control.
